# Supplementary material
Source: publisher site journal article supplement (https://www.spandidos-publications.com/3578/downloadSupplementary)
Supplement: Supplementary file 1 [file downloadSupplementary]

Figure S1. Effects of LIPOSA on body weight. Body weight flow was measured every week after treatments with LIPOSA. Statistically significant difference was not observed between normal mice and the LIPOSA-treated group after treatments with LIPOSA. Quantitative data are shown as the mean  $\pm$  standard error of the mean.

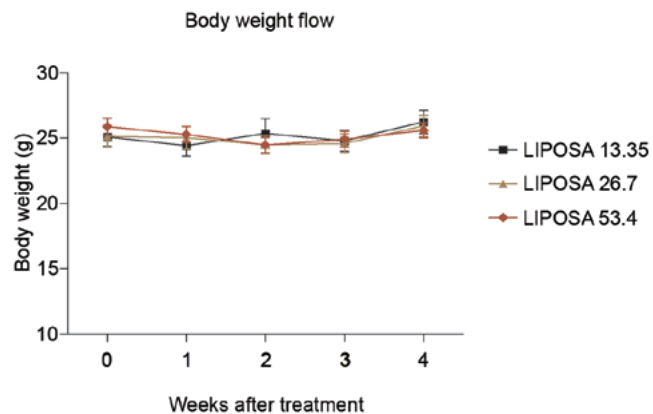

Table SI. Effects of LIPOSA pharmacopuncture on food intake.

| Parameter                                                                                                                          | LIPOSA concentration, mg/ml |           |           |
|------------------------------------------------------------------------------------------------------------------------------------|-----------------------------|-----------|-----------|
|                                                                                                                                    | 13.35                       | 26.7      | 53.4      |
| Food intake (g/day/mouse)                                                                                                          | 1.744±0.83                  | 1.77±0.23 | 1.86±0.36 |
| Food intake were measured by week after treatment. Presented quantitative data are shown as the mean ± standard error of the mean. |                             |           |           |
